# Supplementary material
Source: publisher figshare collection journal article supplement (https://sage.figshare.com/ndownloader/files/13773758)
Supplement: Supplementary file 1 [file 13773758]

| <b>Supplementary Material: Search Terms</b>                  |
|--------------------------------------------------------------|
| Adaptive Design                                              |
| Adaptive Dose Escalation*                                    |
| Adaptive Dose Finding                                        |
| Adaptive Randomization                                       |
| Adaptive Treatment Selection*                                |
| Continual Re-Assessment Method (and “CRM and Reassessment”)* |
| Early Stopping*                                              |
| Flexible Design                                              |
| Group Sequential                                             |
| Innovative Design                                            |
| Interim Analysis                                             |
| Interim Monitoring                                           |
| Population Enrichment                                        |
| Response Adaptive*                                           |
| Sample Size Re-Assessment                                    |
| Sample Size Re-Estimation                                    |
| Seamless Design                                              |
| Stopping Boundary*                                           |

**Footnote 1:** Spelling variations were included as appropriate.

**Footnote 2:** \* indicates new search terms in addition to the 12 search terms used in 2012 literature and registry review
